# Supplementary material for: Experimental observation and quantum chemical investigation of thallium(i) (Z)-methanediazotate: synthesis of a long sought and highly reactive species
Source: Royal Society of Chemistry journal article supplement (doi:10.1039/c7ra00872d), 2017-01-01
Supplement: c7ra00872d1.pdf [file c7ra00872d1.pdf]

## Supporting Information

### Experimental observation and quantum-chemical investigation of thallium(I) (Z)-methanediazotate: synthesis of a long sought and highly reactive species

*Neeraj Singh, Benjamin Fiedler\*, Joachim Friedrich and Klaus Banert\**

*Chemnitz University of Technology, Organic Chemistry, Strasse der Nationen  
62, 09111 Chemnitz, Germany*

*Email: benjamin.fiedler@chemie.tu-chemnitz.de; klaus.banert@chemie.tu-chemnitz.de*

#### Table of Contents

|                                                                                                       |    |
|-------------------------------------------------------------------------------------------------------|----|
| [1] General Information.....                                                                          | 2  |
| [2] Experimental procedures .....                                                                     | 3  |
| [2a] Synthesis of <sup>15</sup> N labelled <i>N</i> -methyl- <i>N</i> -nitrosourea ( <b>7</b> ):..... | 3  |
| [2b] Synthesis of thallium(I) <i>n</i> -propoxide (TIOPr):.....                                       | 3  |
| [2c] Reaction of <sup>15</sup> N labelled <i>N</i> -nitrosourea <b>7</b> with TIOEt:.....             | 3  |
| [2d] Synthesis of thallium(I) (Z)-methanediazotate ( <b>3</b> ): .....                                | 4  |
| [3] NMR Spectra .....                                                                                 | 5  |
| [4] Coordinates of Optimised Geometries.....                                                          | 16 |
| [5] Energies.....                                                                                     | 21 |

## [1] General Information

**NMR spectra** were measured on a *UNITY INOVA 400* FT spectrometer from VARIAN.  $^1\text{H}$  NMR spectra were measured at 400 MHz,  $^{13}\text{C}$  NMR at 100 MHz and  $^{15}\text{N}$  NMR at 40.5 MHz, respectively. NMR signals were referenced to TMS ( $\delta = 0$ ) or solvent signals and recalculated relative to TMS.  $^{15}\text{N}$  NMR were referenced to external  $\text{MeNO}_2$  ( $\delta = 0$ ). DEPT 135 and 2D NMR methods, such as  $^{15}\text{N}, ^1\text{H}$  gHMBCAD, etc. were used for assignment of signals, when necessary. Multiplicities of the signals are reported using the standard notations: s = singlet, d = doublet, t = triplet, q = quartet, m = sext. = sextet, br. s = broad singlet, etc.

**Note:** *N-methyl-N-nitrosourea is a highly potent carcinogen, therefore, great precautions should be taken while handling it. Thallium(I) propoxide is a toxic compound and should be handled in accordance with safety protocols. Thallium (E)-diazotate can also lead to spontaneous explosions, therefore great care must be exercised while handling the highly reactive (Z)-diazotate.*

## [2] Experimental procedures

### [2a] Synthesis of <sup>15</sup>N labelled *N*-methyl-*N*-nitrosourea (**7**):

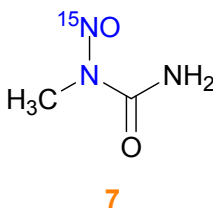

<sup>15</sup>N labelled *N*-nitrosourea **7** was synthesised analogous to a literature known procedure.

<sup>1</sup>H NMR (400 MHz, CD<sub>2</sub>Cl<sub>2</sub>): δ = 3.15 (d, 3H, <sup>3</sup>J(<sup>15</sup>N, <sup>1</sup>H) = 0.8 Hz, CH<sub>3</sub>), 5.68 (br. s, 1H, NH), 6.90 (br. s, 1H, NH).

<sup>13</sup>C NMR (100 MHz, CD<sub>2</sub>Cl<sub>2</sub>): δ = 26.50 (q, CH<sub>3</sub>, <sup>2</sup>J(<sup>15</sup>N, <sup>13</sup>C) = 0.9 Hz), 154.53 (s, CO).

<sup>15</sup>N NMR (40.5 MHz, CD<sub>2</sub>Cl<sub>2</sub>): δ = 182.56 (<sup>15</sup>NO).

### [2b] Synthesis of thallium(I) *n*-propoxide (TIOPr):

TIOPr was synthesised from thallium(I) ethoxide (TIOEt) utilising a known procedure, by an exchange reaction in ethanol.

<sup>1</sup>H NMR (400 MHz, CD<sub>2</sub>Cl<sub>2</sub>): δ = 0.91 (t, 3H, <sup>3</sup>J = 7.2 Hz, CH<sub>3</sub>), 1.66 (sext., 2H, <sup>3</sup>J = 7.2 Hz, CH<sub>3</sub>CH<sub>2</sub>CH<sub>2</sub>OTI), 3.99 (t, 2H, <sup>3</sup>J = 7.2 Hz, CH<sub>3</sub>CH<sub>2</sub>CH<sub>2</sub>OTI).

<sup>13</sup>C NMR (100 MHz, CD<sub>2</sub>Cl<sub>2</sub>): δ = 10.99 (q, CH<sub>3</sub>), 29.75 (t, CH<sub>3</sub>CH<sub>2</sub>CH<sub>2</sub>OTI), 66.24 (t, CH<sub>3</sub>CH<sub>2</sub>CH<sub>2</sub>OTI).

### [2c] Reaction of <sup>15</sup>N labelled *N*-nitrosourea **7** with TIOEt:

To a mixture of <sup>15</sup>N labelled *N*-methyl-*N*-nitrosourea (**7**) (0.096 mmol, 10 mg) in CD<sub>2</sub>Cl<sub>2</sub> (0.76 mL) maintained at -40 °C, was added TIOEt (1.1 eq) and the reaction mixture was stirred for 5 min, and subsequently, transferred to a pre-cooled NMR tube maintained at the above mentioned temperature. Low-temperature NMR spectral analysis revealed the formation of CH<sub>2</sub>N<sup>15</sup>N (21%) as the sole product.

<sup>1</sup>H NMR (400 MHz, CD<sub>2</sub>Cl<sub>2</sub>): δ = 3.32 (d, <sup>3</sup>J(<sup>15</sup>N, <sup>1</sup>H) = 0.8 Hz).

<sup>15</sup>N NMR (40.5 MHz, CD<sub>2</sub>Cl<sub>2</sub>): δ = 14.86 (CH<sub>2</sub>N<sup>15</sup>N).

The assignment was further confirmed by <sup>15</sup>N, <sup>1</sup>H gHMBCAD 2D NMR technique.

## [2d] Synthesis of thallium(I) (Z)-methanediazotate (3):

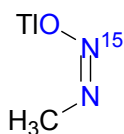

(Z)-diazotate **3**

To a mixture of  $^{15}\text{N}$  labelled *N*-methyl-*N*-nitrosourea (**7**) (0.096 mmol, 10 mg) in  $\text{CD}_2\text{Cl}_2$  (0.76 mL) maintained at  $-60\text{ }^\circ\text{C}$ , was added TIOPr (1.1 eq) and the reaction mixture was stirred for 1 h. Subsequently, the reaction mixture was transferred to a pre-cooled NMR tube maintained at  $-60\text{ }^\circ\text{C}$  and NMR spectra were recorded at the same temperature. The reaction was completed in an additional 30 min, as observed by NMR spectroscopy. NMR yields of (Z)-diazotate **3** and  $\text{CH}_2\text{N}^{15}\text{N}$  are 14% and 31%, respectively. Diazotate **3** was stable for only for 2 h at  $-60\text{ }^\circ\text{C}$ , and decomposed to  $\text{CH}_2\text{N}^{15}\text{N}$  above  $-10\text{ }^\circ\text{C}$ . Any attempt to isolate **3** led to the isolation of only  $\text{CH}_2\text{N}^{15}\text{N}$ , even at very low temperatures.

### For (Z)-diazotate **3**:

$^1\text{H}$  NMR (400 MHz,  $\text{CD}_2\text{Cl}_2$ ):  $\delta = 3.17$  (d,  $^3J(^{15}\text{N}, ^1\text{H}) = 4.0$  Hz).

$^{15}\text{N}$  NMR (40.5 MHz,  $\text{CD}_2\text{Cl}_2$ ):  $\delta = 104.46$  ( $^{15}\text{NOTI}$ ).

*Note:*  $^{13}\text{C}$  NMR data acquisition was not possible owing to the low concentration and very low stability of the diazotate **3**.

### For $\text{CH}_2\text{N}^{15}\text{N}$ :

$^1\text{H}$  NMR (400 MHz,  $\text{CD}_2\text{Cl}_2$ ):  $\delta = 3.33$  (d,  $^3J(^{15}\text{N}, ^1\text{H}) = 1.2$  Hz).

$^{15}\text{N}$  NMR (40.5 MHz,  $\text{CD}_2\text{Cl}_2$ ):  $\delta = 14.57$  ( $\text{CH}_2\text{N}^{15}\text{N}$ ).

The assignments, in both the cases, were confirmed by  $^{15}\text{N}, ^1\text{H}$  gHMBCAD 2D NMR technique.

### [3] NMR Spectra

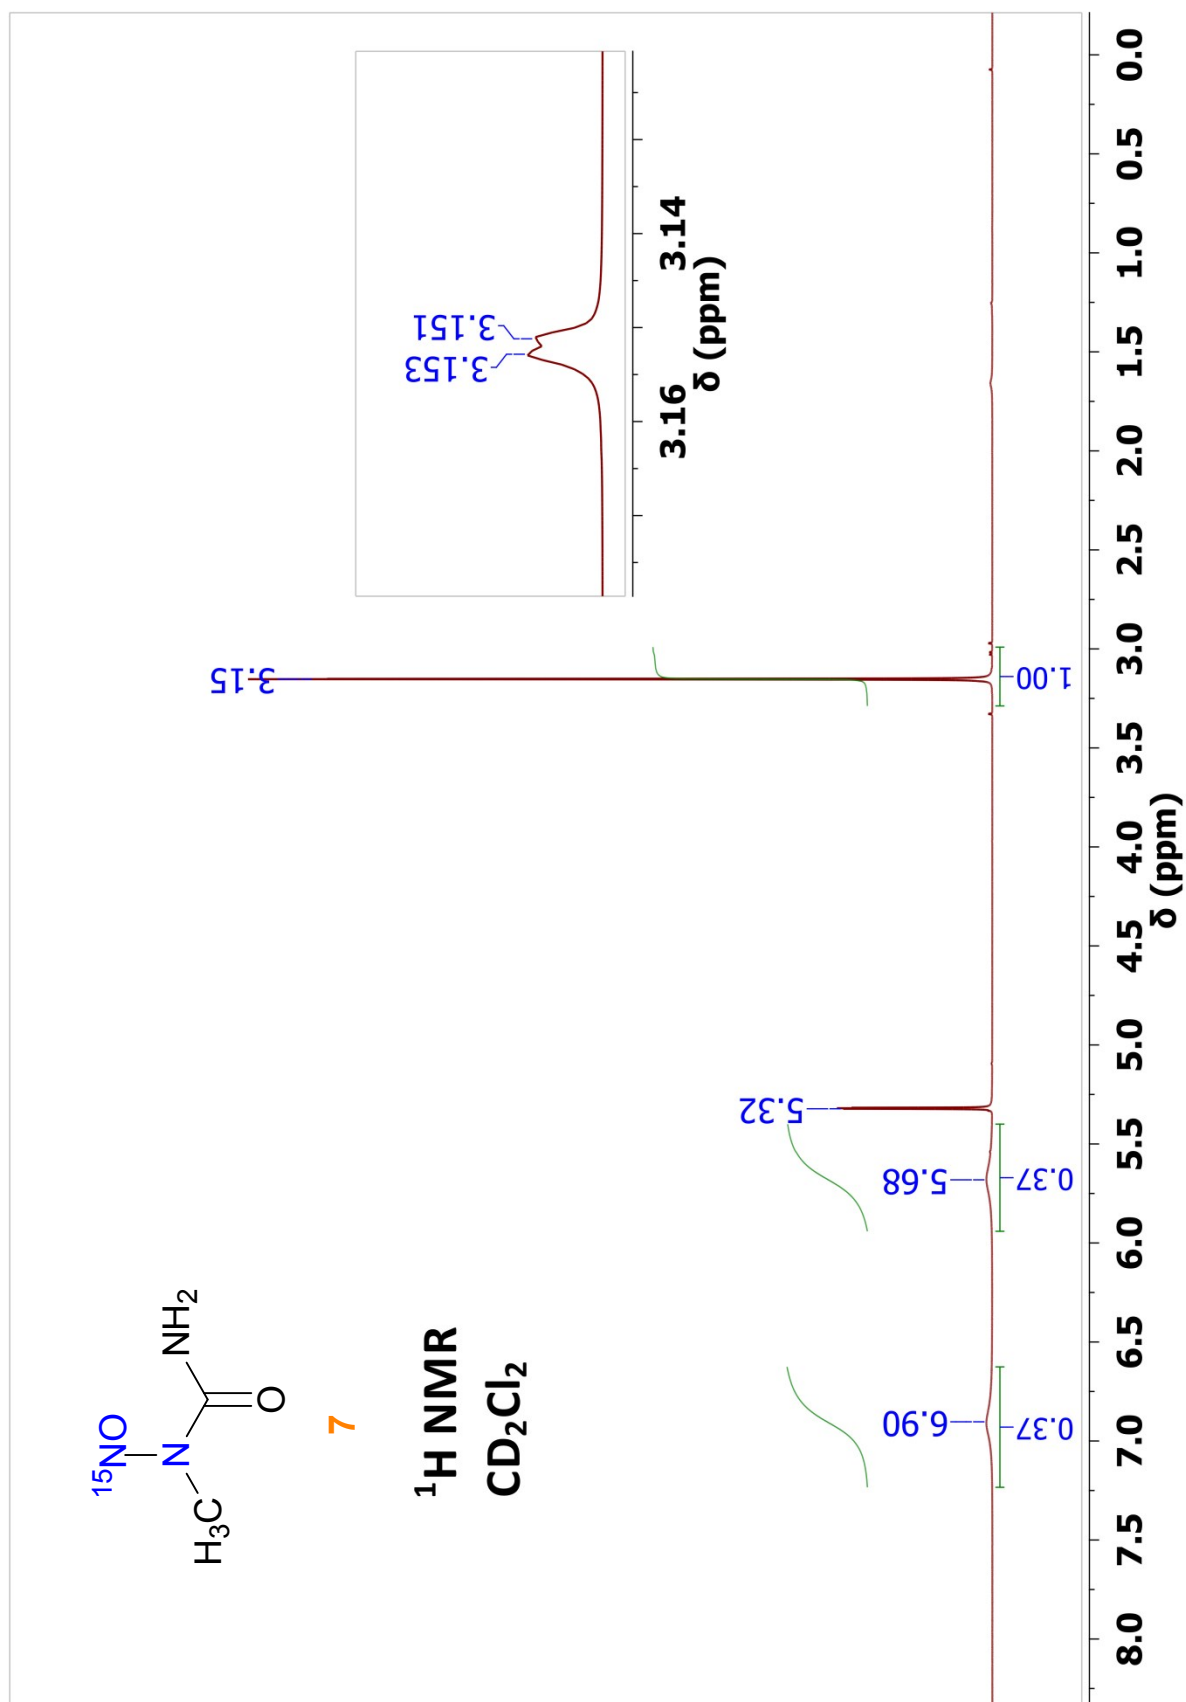

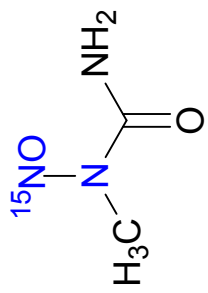

7

<sup>13</sup>C NMR  
CD<sub>2</sub>Cl<sub>2</sub>

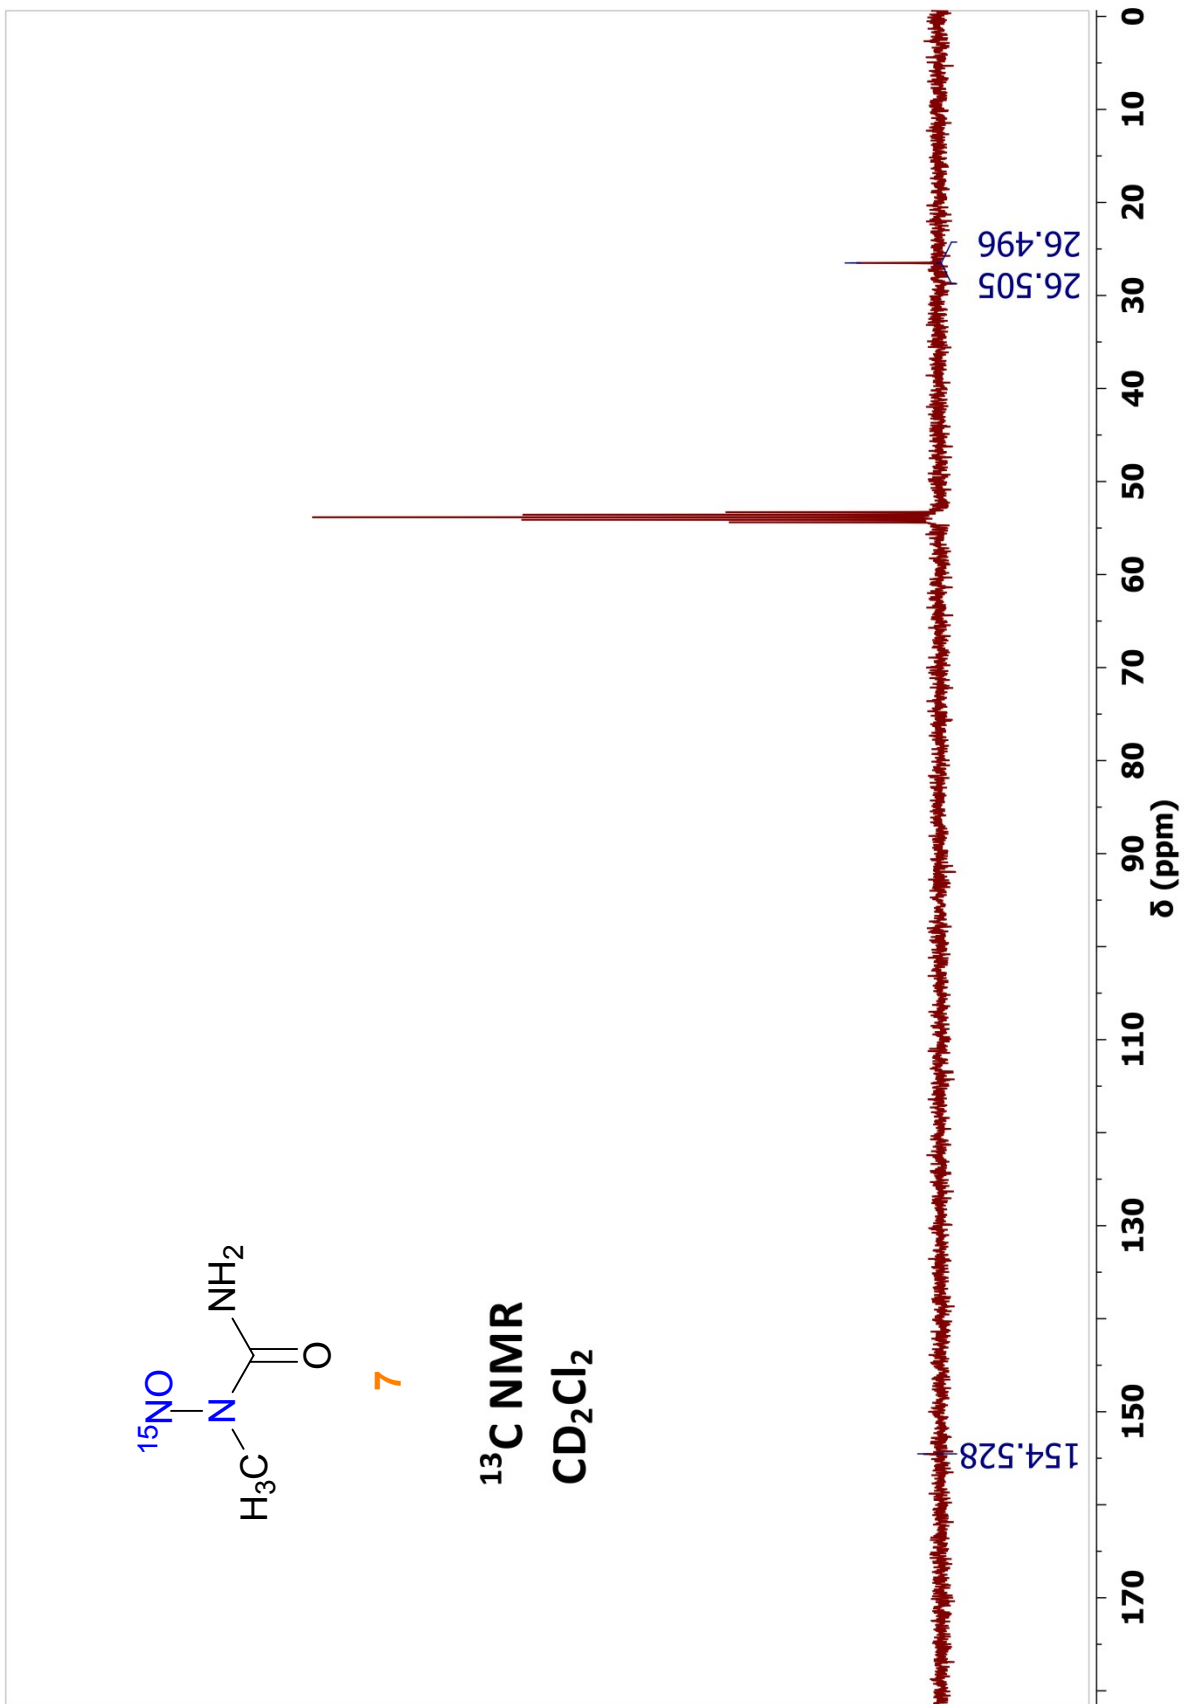

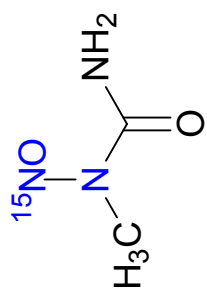

7

<sup>15</sup>N NMR  
CD<sub>2</sub>Cl<sub>2</sub>

182.56

δ (ppm)

-350

-250

-150

-50

0

50

150

250

350

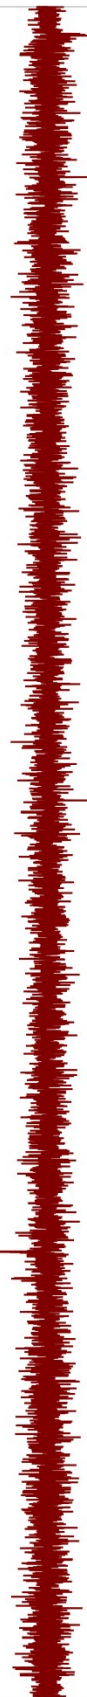

**<sup>1</sup>H NMR of TIOPr  
CD<sub>2</sub>Cl<sub>2</sub>**

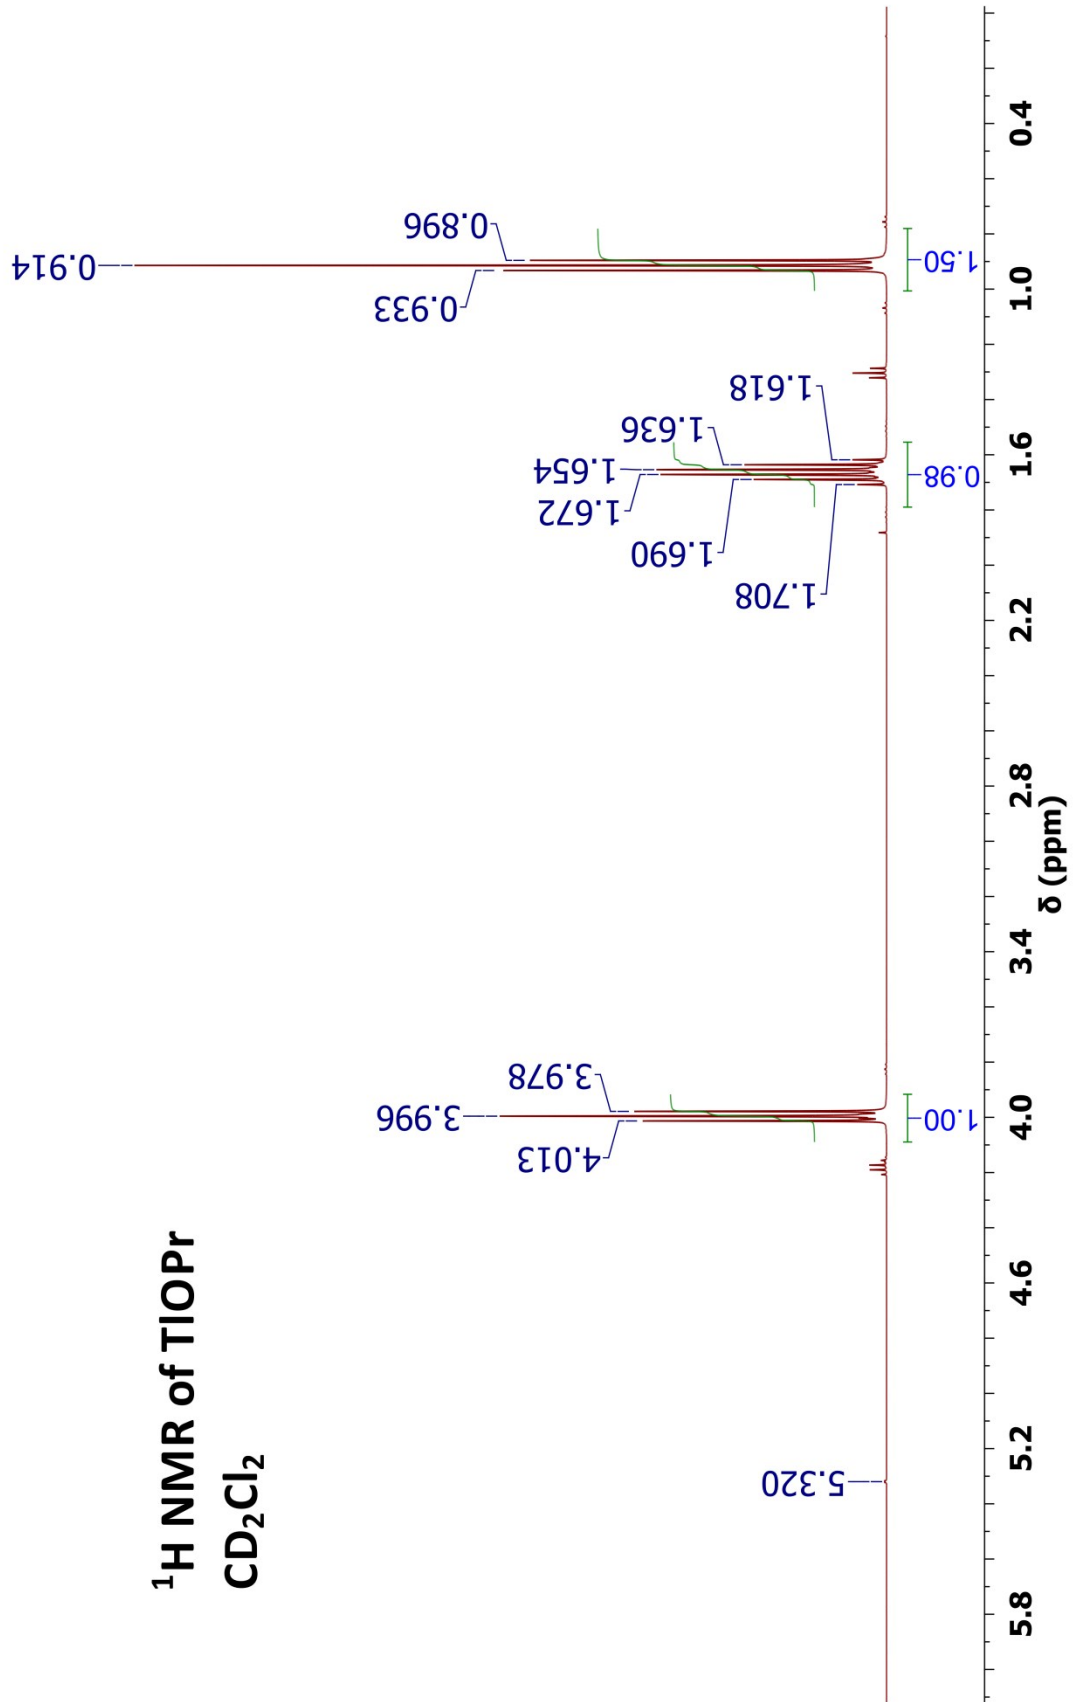



**$^{13}\text{C}$  NMR of TIOPr**

**$\text{CD}_2\text{Cl}_2$**

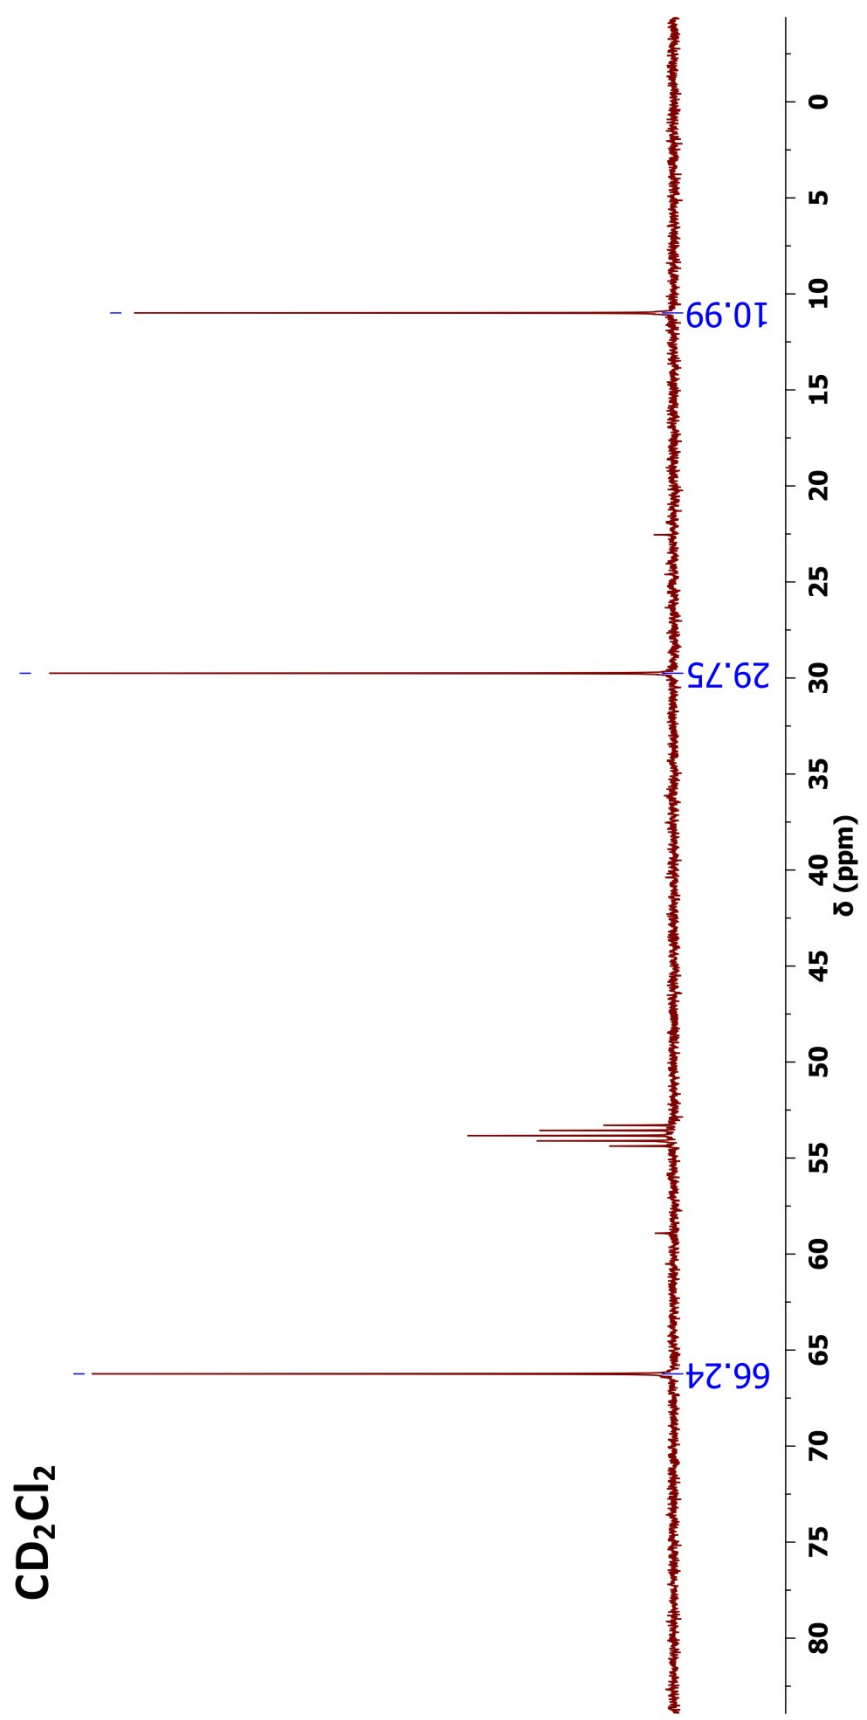

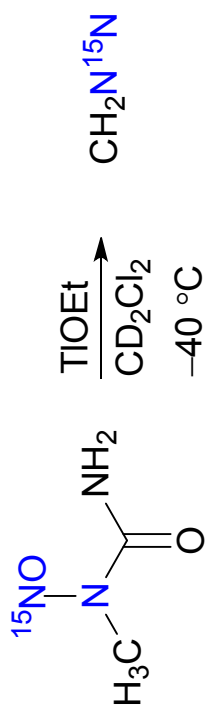

7

$^1\text{H}$  NMR ( $-40^\circ\text{C}$ )  
 $\text{CD}_2\text{Cl}_2$

$\text{CH}_2\text{N}^{15}\text{N}$

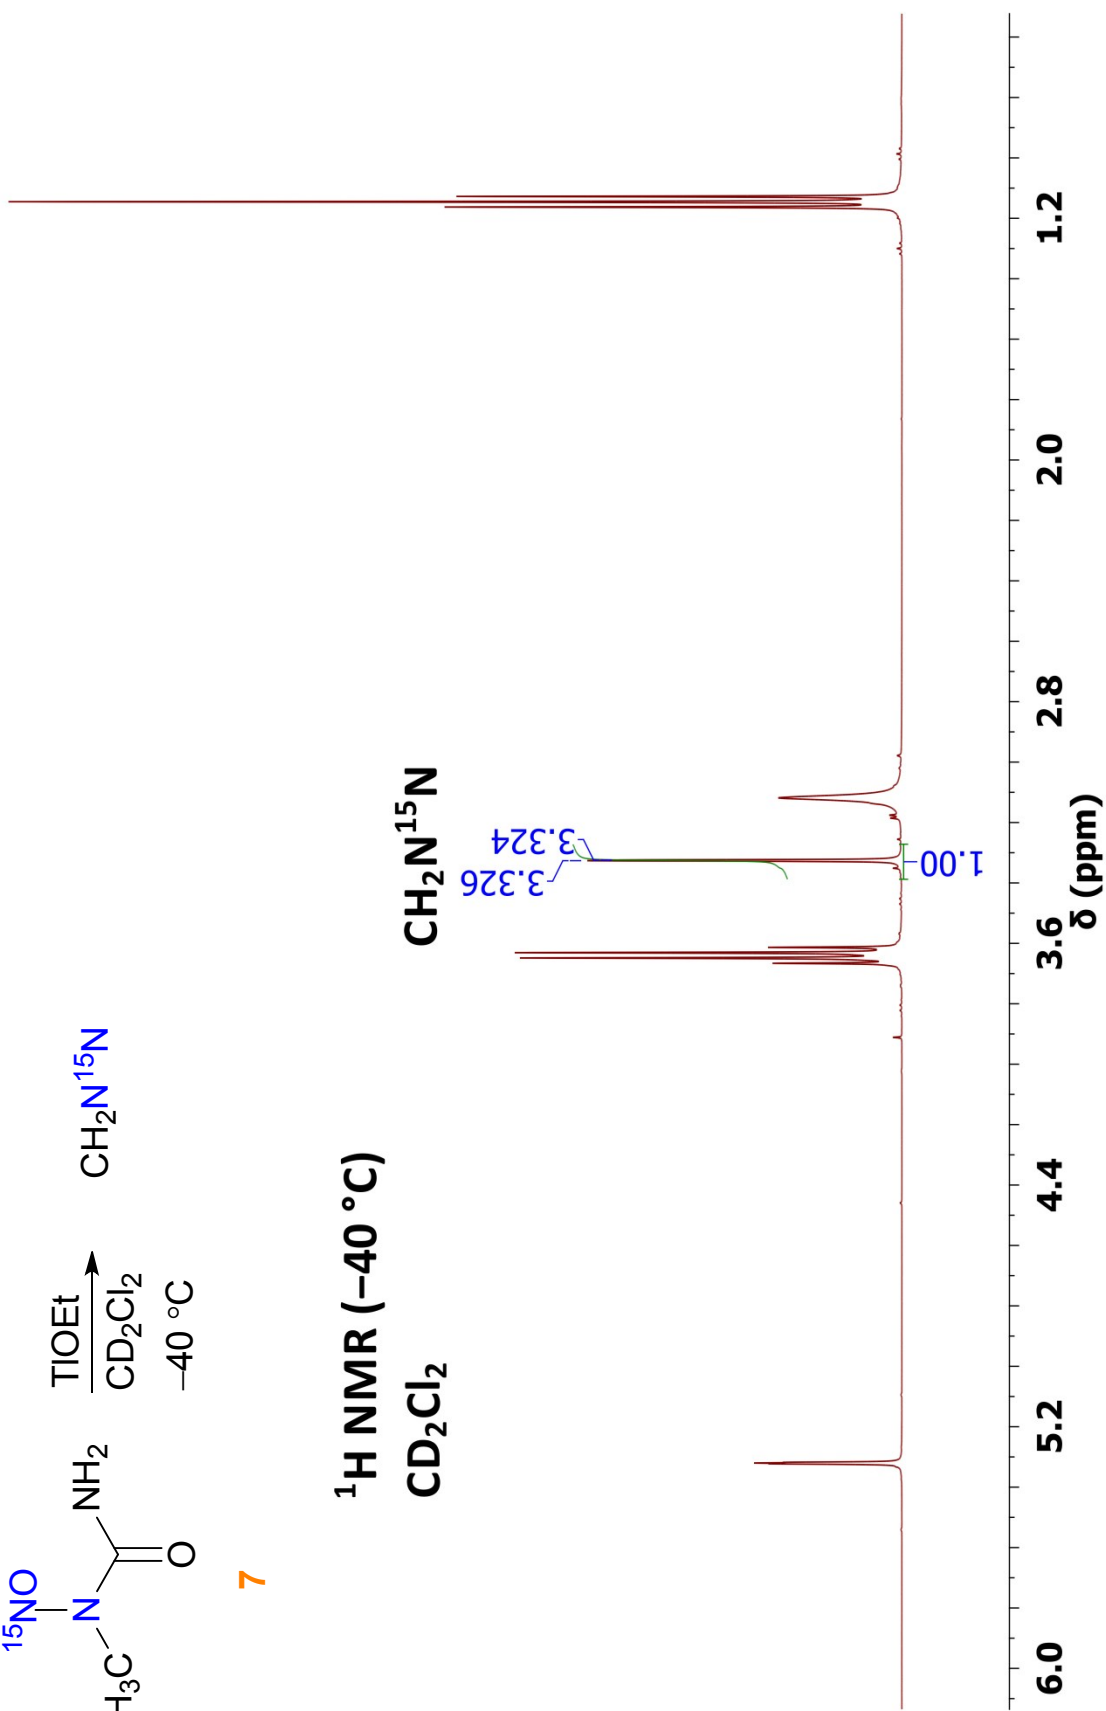

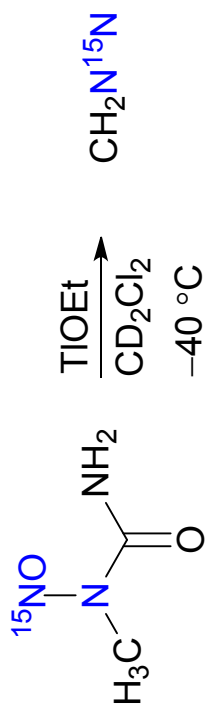

7

$^{15}\text{N}$  NMR ( $-40^\circ\text{C}$ )  
 $\text{CD}_2\text{Cl}_2$   
 $\text{CH}_2\text{N}^{15}\text{N}$

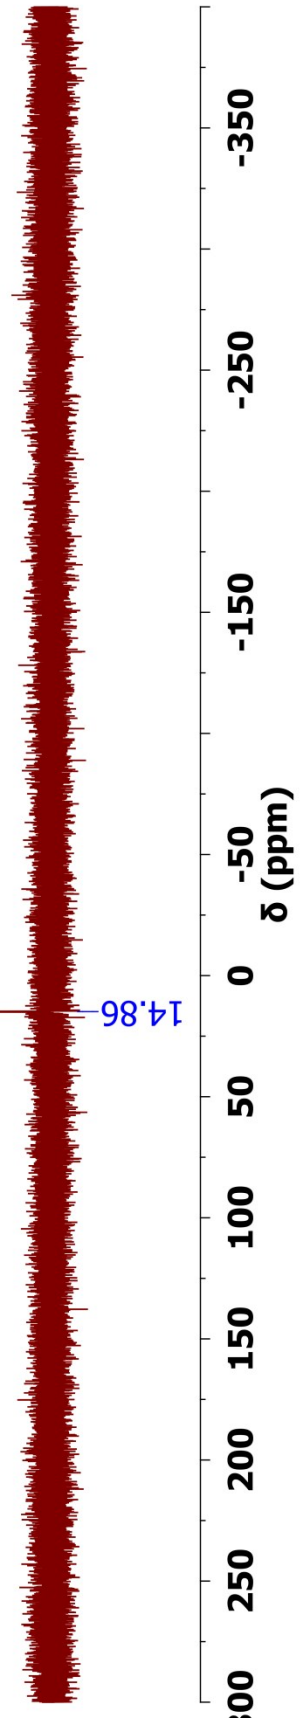

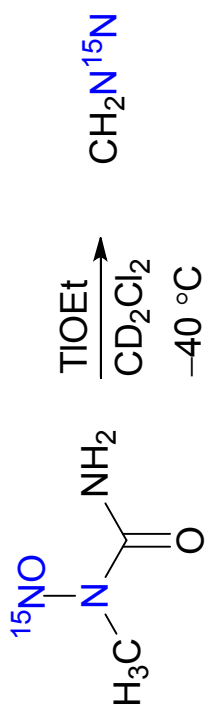

7

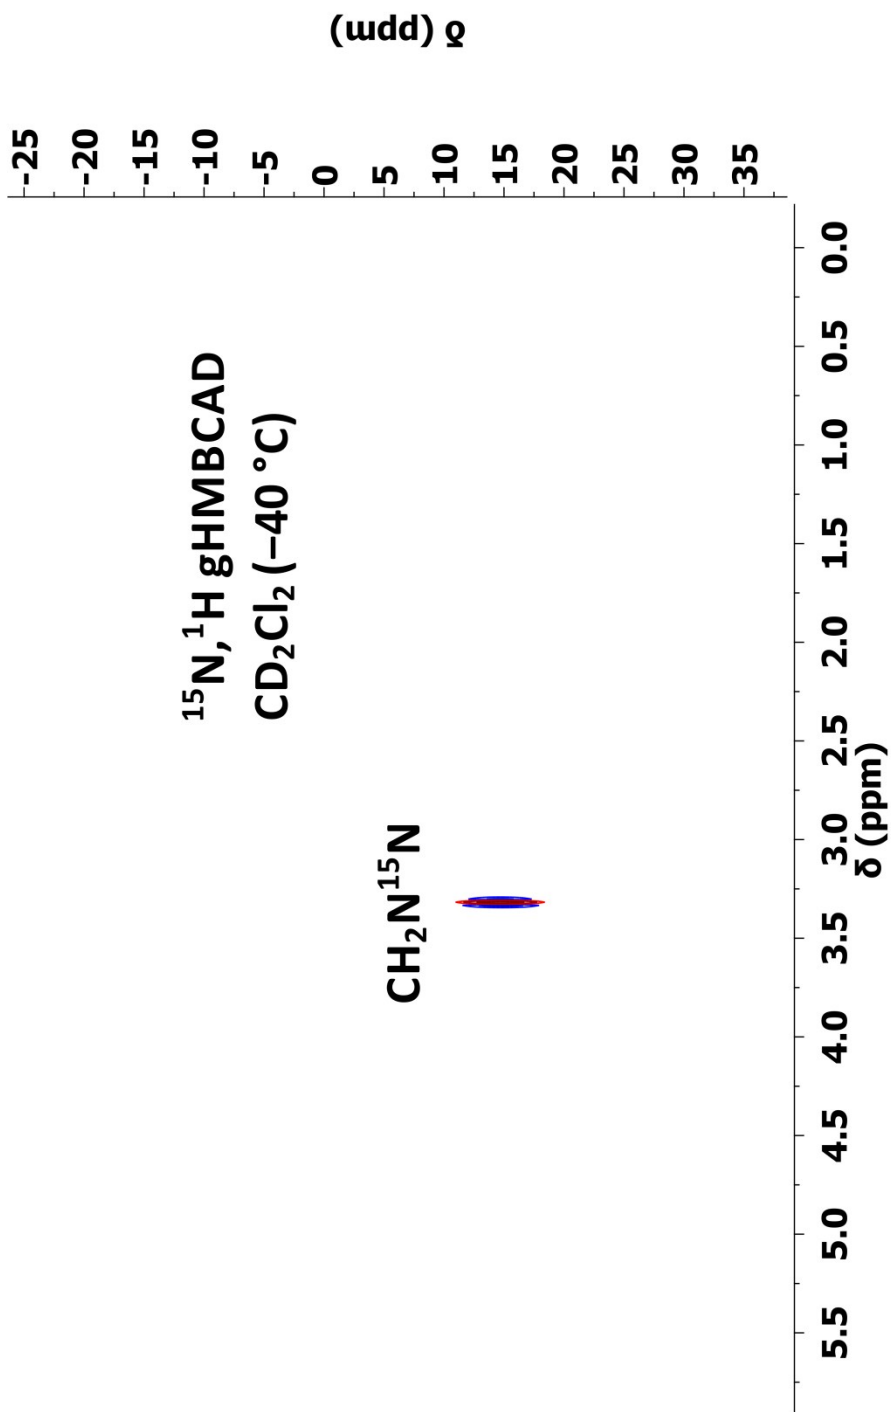

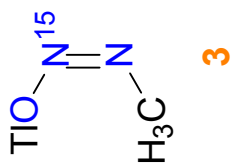

**$^1\text{H}$  NMR of **3****  
 **$\text{CD}_2\text{Cl}_2$  ( $-60^\circ\text{C}$ )**

**$\text{CH}_2\text{N}^{15}\text{N}$**

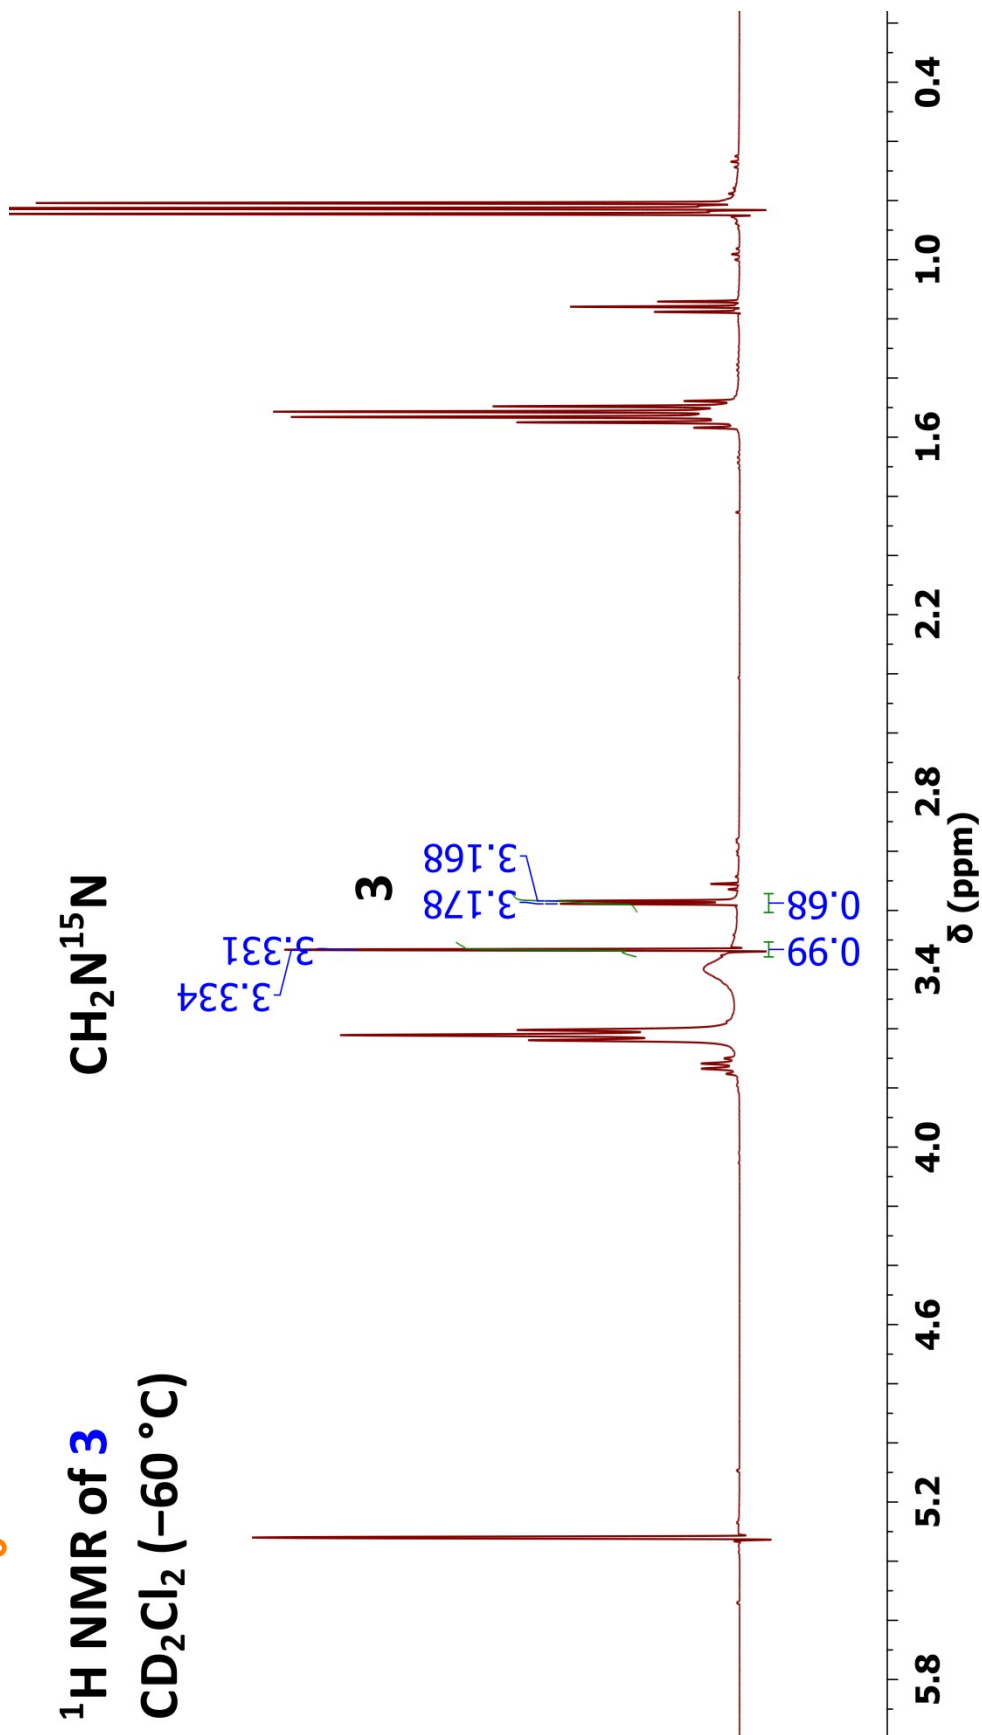

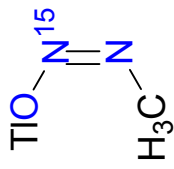

**3**

$^{15}\text{N}$  NMR of **3**  
 $\text{CD}_2\text{Cl}_2$  ( $-60^\circ\text{C}$ )

$\text{CH}_2\text{N}^{15}\text{N}$

14.57

**3**

$^{15}\text{NO}$  from **7**

181.67

104.46

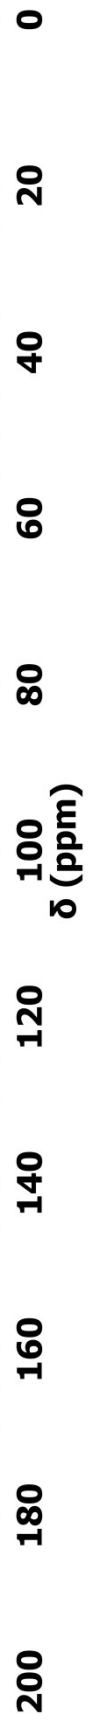

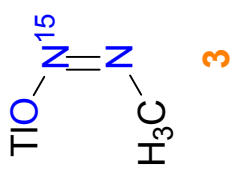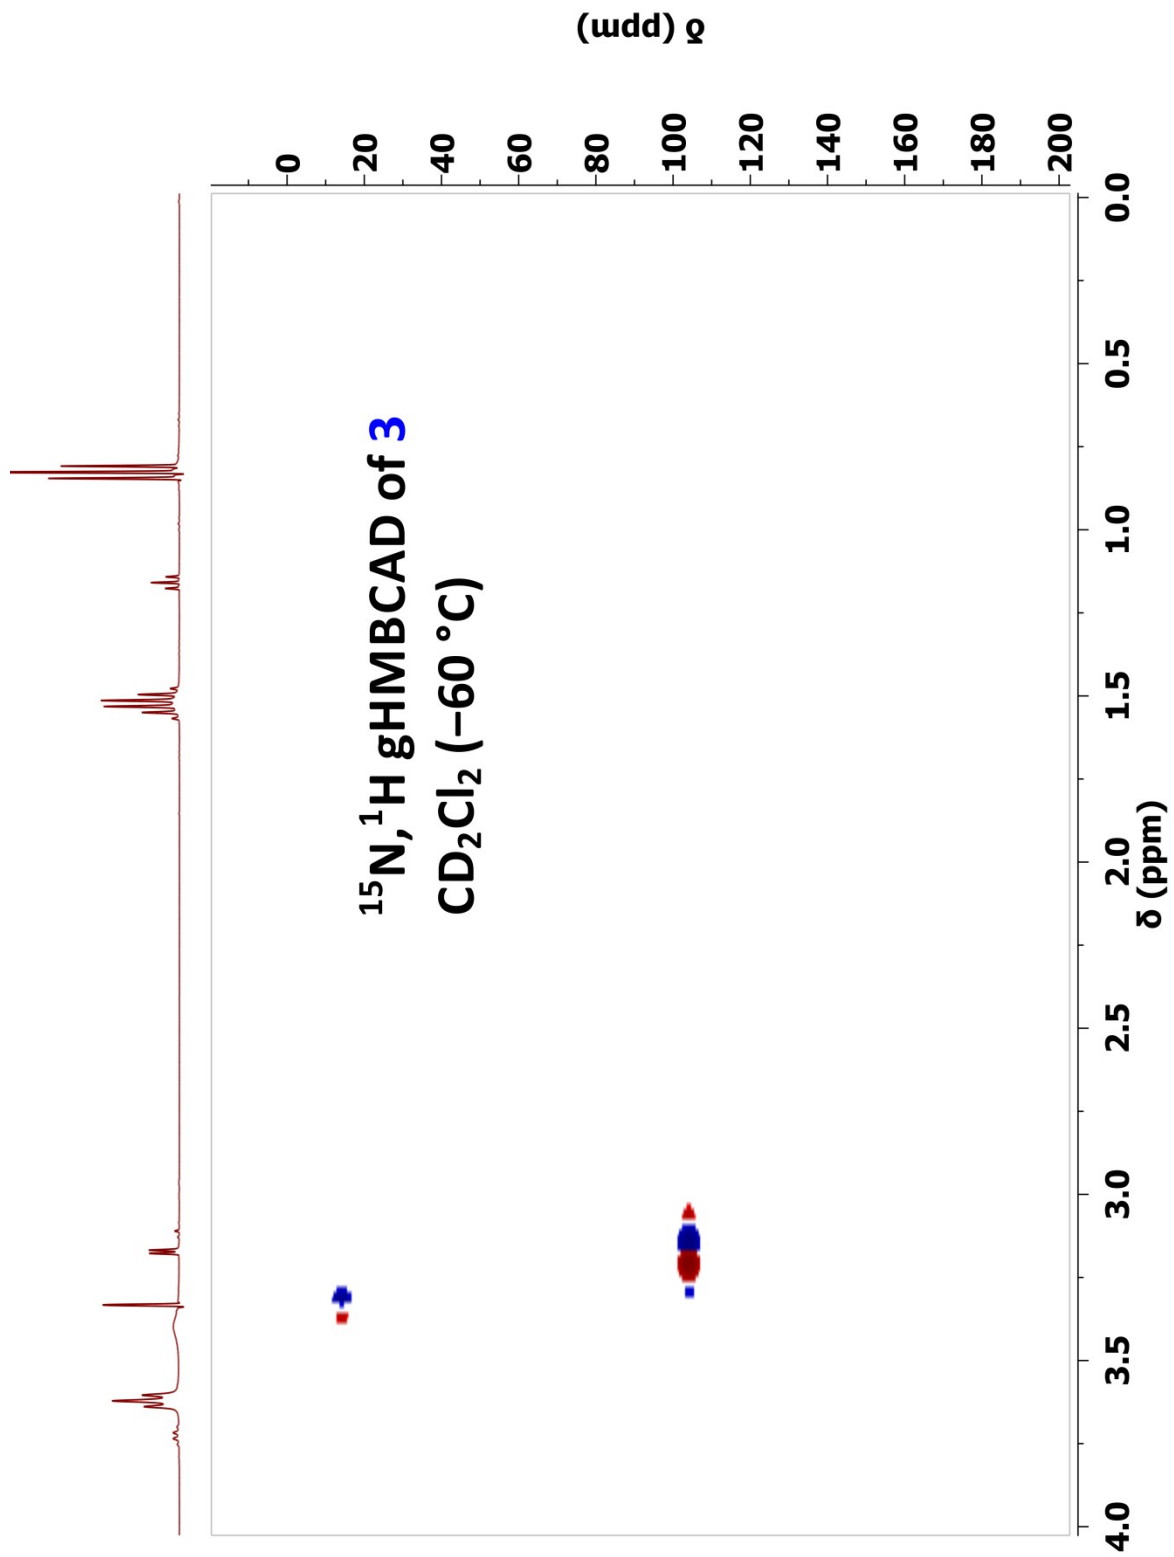

## [4] Coordinates of Optimised Geometries

All coordinates are given in Å. The structures were optimised with PW6B95-D3/(def2-)TZVPP, using the COSMO model with  $\epsilon = 8.9$ .

| <i>anti-7</i>                         |            |            | <i>syn-7</i>   |    |            |            |            |
|---------------------------------------|------------|------------|----------------|----|------------|------------|------------|
| N                                     | -0.6127738 | 1.0431081  | -0.2162466     | N  | -0.0525209 | 0.2923150  | -0.3303187 |
| N                                     | 0.6866870  | 1.1772793  | -0.0334681     | N  | 0.7383803  | -0.5275242 | -1.0054375 |
| C                                     | 1.4531809  | -0.0123174 | 0.1080782      | C  | 1.0732502  | -1.8962566 | -0.7401842 |
| N                                     | 0.7553940  | -1.1459142 | 0.0478683      | N  | 0.5302578  | -2.4653256 | 0.3311873  |
| H                                     | -0.2346590 | -1.1477638 | -0.0988224     | H  | -0.0925527 | -1.9573320 | 0.9304880  |
| H                                     | 1.2541830  | -2.0094801 | 0.1325220      | H  | 0.7680551  | -3.4218063 | 0.5134693  |
| O                                     | 2.6514443  | 0.0677294  | 0.2716037      | O  | 1.8320433  | -2.4410462 | -1.5149152 |
| C                                     | 1.2992703  | 2.4871829  | 0.0200096      | C  | 1.3496808  | 0.0651298  | -2.1844809 |
| H                                     | 2.3573847  | 2.3503647  | 0.1789625      | H  | 1.0516017  | -0.4816359 | -3.0703096 |
| H                                     | 1.1159727  | 3.0091211  | -0.9127111     | H  | 1.0046150  | 1.0880174  | -2.2397092 |
| H                                     | 0.8596594  | 3.0569593  | 0.8312030      | H  | 2.4285294  | 0.0357486  | -2.0962309 |
| O                                     | -1.2230089 | 2.0816574  | -0.3307703     | O  | -0.5992466 | -0.1299344 | 0.6664837  |
| <b>3 (Z)</b>                          |            |            | <b>1 (E)</b>   |    |            |            |            |
| N                                     | -2.3104582 | 0.9426749  | 0.5583372      | N  | -2.3786410 | 0.4865301  | 0.1021794  |
| N                                     | -1.2625233 | 0.4075503  | 0.1658271      | N  | -1.1397967 | 0.4881507  | -0.0576665 |
| O                                     | -2.3830793 | 1.3824559  | 1.7949834      | O  | -3.0525835 | 0.4851094  | -0.9964676 |
| C                                     | -0.1867305 | 0.3169057  | 1.1442240      | C  | -0.3818614 | 0.4878655  | 1.1744561  |
| H                                     | 0.6594359  | -0.1598508 | 0.6655630      | H  | 0.2604977  | 1.3644215  | 1.2072629  |
| H                                     | 0.0980121  | 1.3034975  | 1.5061289      | H  | -1.0386398 | 0.4894827  | 2.0412439  |
| H                                     | -0.4964921 | -0.2620968 | 2.0127478      | H  | 0.2573176  | -0.3910264 | 1.2084516  |
| TI                                    | -4.6247138 | 2.0523242  | 1.1655271      | TI | -1.2287061 | 0.4896909  | -2.6966712 |
| <b>TS(<i>anti-7</i>→<i>syn-7</i>)</b> |            |            | <b>TS(3→1)</b> |    |            |            |            |
| N                                     | -1.3799145 | -0.2077805 | -0.4858957     | N  | 1.6741022  | 0.0467306  | -0.1616112 |
| N                                     | -0.2435314 | 0.4167522  | 0.2564041      | N  | 2.8903932  | -0.1074936 | -0.2420630 |
| C                                     | 0.9755997  | -0.1801230 | -0.0679708     | O  | 1.2159149  | 1.1791743  | 0.3109628  |
| N                                     | 0.9051733  | -1.5199728 | -0.2415117     | C  | 4.0049944  | -0.6153150 | 0.4661369  |
| H                                     | 0.1653134  | -2.0507559 | 0.1764723      | H  | 4.8929451  | -0.4750427 | -0.1419314 |
| H                                     | 1.7790873  | -1.9981472 | -0.3552006     | H  | 4.1760142  | -0.0915157 | 1.4117813  |
| O                                     | 2.0024479  | 0.4630637  | -0.1746723     | H  | 3.9164217  | -1.6874494 | 0.6744311  |
| C                                     | -0.3198199 | 1.8579761  | 0.0591624      | TI | -0.9035688 | 0.1266619  | -0.4037864 |
| H                                     | 0.5421632  | 2.3002491  | 0.5409509      |    |            |            |            |
| H                                     | -0.3106580 | 2.1274159  | -0.9951807     |    |            |            |            |
| H                                     | -1.2222491 | 2.2294853  | 0.5287109      |    |            |            |            |
| O                                     | -2.1594493 | -0.6896340 | 0.2345367      |    |            |            |            |



**Ed, (Z)**

|    |            |            |            |
|----|------------|------------|------------|
| N  | 0.0266187  | 0.1030325  | -0.5256345 |
| N  | 1.1284205  | -0.4651139 | -0.9343232 |
| C  | 1.0173528  | -1.7011765 | -1.6524379 |
| N  | -0.2086445 | -2.1798421 | -1.7963853 |
| H  | -1.0898985 | -1.7653428 | -1.4361563 |
| H  | -0.2635854 | -3.0393455 | -2.3091715 |
| O  | 2.0408921  | -2.2100545 | -2.0684766 |
| C  | 2.4153648  | 0.1416700  | -0.6666014 |
| H  | 3.1728264  | -0.4899257 | -1.1026744 |
| H  | 2.4430012  | 1.1342352  | -1.1024810 |
| H  | 2.5553147  | 0.2290811  | 0.4052029  |
| O  | 0.1742534  | 1.1487831  | 0.0823119  |
| O  | -2.6970881 | -1.4165600 | -1.0293859 |
| C  | -3.4840173 | -2.5628881 | -1.0531030 |
| H  | -4.4547706 | -2.3744542 | -1.5308888 |
| H  | -2.9986522 | -3.3380697 | -1.6641240 |
| C  | -3.7390535 | -3.1483995 | 0.3272565  |
| H  | -4.2516558 | -2.3991505 | 0.9339036  |
| H  | -2.7762101 | -3.3299052 | 0.8031437  |
| C  | -4.5616813 | -4.4225670 | 0.2803842  |
| H  | -4.7382251 | -4.8232884 | 1.2745252  |
| H  | -5.5302299 | -4.2434192 | -0.1821882 |
| H  | -4.0558358 | -5.1895035 | -0.3023005 |
| TI | -2.9870726 | 0.4369806  | 0.2245960  |

**TS(Ed-IM), (Z)**

|   |            |            |            |
|---|------------|------------|------------|
| H | 1.0223848  | -0.3586137 | -1.4132324 |
| N | 1.1419860  | 1.0684299  | 0.7155322  |
| N | 2.4032324  | 1.0031857  | 0.4390705  |
| O | 0.8543325  | 1.0504212  | 1.9094967  |
| C | 2.8074958  | 0.9946875  | -0.9643484 |
| C | 3.3828864  | 0.9373157  | 1.5007697  |
| N | 1.9115816  | 0.4747297  | -1.7672015 |
| O | 3.9174010  | 1.4534363  | -1.2010762 |
| H | 4.3598682  | 0.9248027  | 1.0434105  |
| H | 3.2791740  | 1.7946969  | 2.1567543  |
| H | 3.2122642  | 0.0361785  | 2.0832197  |
| O | 0.1458548  | -1.1203778 | -1.0861406 |
| H | 2.2179858  | 0.5051233  | -2.7264058 |
| C | 0.6110493  | -2.3827151 | -0.6789042 |
| H | -0.2280284 | -2.9683050 | -0.2947626 |
| H | 1.0025860  | -2.9312381 | -1.5413239 |
| C | 1.6895698  | -2.3064184 | 0.3865022  |
| H | 1.3113241  | -1.7253213 | 1.2279559  |

**Ed, (E)**

|    |            |            |            |
|----|------------|------------|------------|
| N  | 0.2396524  | 0.3660172  | -0.1014943 |
| N  | 0.8318235  | -0.4595191 | -0.9099734 |
| C  | 1.3174461  | -1.7861036 | -0.5187190 |
| N  | 0.3573249  | -2.6008021 | -0.1416105 |
| H  | -0.6388800 | -2.2772834 | -0.0594489 |
| H  | 0.6313707  | -3.5138128 | 0.1722352  |
| O  | 2.5049373  | -2.0085261 | -0.6307756 |
| C  | 1.2273262  | 0.0517482  | -2.2053402 |
| H  | 0.8256870  | -0.5804728 | -2.9893216 |
| H  | 0.8305275  | 1.0539615  | -2.2980791 |
| H  | 2.3090541  | 0.0708251  | -2.2735693 |
| O  | 0.0517563  | -0.0285128 | 1.0440508  |
| O  | -2.1539221 | -1.7192780 | 0.0052707  |
| C  | -3.0449869 | -2.5573689 | -0.6615038 |
| H  | -3.9453644 | -2.0147150 | -0.9786987 |
| H  | -2.5829919 | -2.9313619 | -1.5851672 |
| C  | -3.4776488 | -3.7541396 | 0.1700390  |
| H  | -3.9631461 | -3.3902333 | 1.0768063  |
| H  | -2.5854761 | -4.2912355 | 0.4906989  |
| C  | -4.4094502 | -4.6822927 | -0.5869711 |
| H  | -4.7074254 | -5.5339375 | 0.0180608  |
| H  | -5.3133037 | -4.1605956 | -0.8949291 |
| H  | -3.9288413 | -5.0645451 | -1.4851339 |
| TI | -2.6737127 | -0.3488424 | 1.7440064  |

**TS(Ed-IM), (E)**

|   |            |            |            |
|---|------------|------------|------------|
| N | 2.3272920  | 0.8540743  | -1.0872972 |
| N | 2.9730956  | -0.1221333 | -0.5605331 |
| O | 1.4613631  | 1.3897626  | -0.3840699 |
| C | 2.7964193  | -0.5652835 | 0.8467479  |
| C | 4.0732795  | -0.6850229 | -1.3116177 |
| N | 1.6936890  | -1.2391601 | 1.0177472  |
| O | 3.7070842  | -0.2891173 | 1.6098366  |
| H | 3.9089006  | -1.7469240 | -1.4608729 |
| H | 4.1232490  | -0.1791512 | -2.2667398 |
| H | 4.9951700  | -0.5367511 | -0.7600238 |
| O | -0.0924984 | -1.2302576 | -0.6800597 |
| H | 1.5589684  | -1.5541039 | 1.9655768  |
| C | -0.7419582 | -2.4492609 | -0.9187398 |
| H | -1.5094871 | -2.3093131 | -1.6843376 |
| H | -0.0290828 | -3.1752575 | -1.3238893 |
| C | -1.3855220 | -3.0359777 | 0.3257479  |
| H | -2.0964313 | -2.3118860 | 0.7261333  |
| H | -0.6185329 | -3.1744616 | 1.0866734  |

|    |            |            |            |    |            |            |            |
|----|------------|------------|------------|----|------------|------------|------------|
| H  | 2.5411034  | -1.7618965 | -0.0166667 | C  | -2.0861520 | -4.3511161 | 0.0418307  |
| C  | 2.1267278  | -3.6840418 | 0.8499663  | H  | -2.5431981 | -4.7620394 | 0.9371283  |
| H  | 2.9115210  | -3.6213587 | 1.5981432  | H  | -2.8686979 | -4.2204013 | -0.7025754 |
| H  | 1.2939089  | -4.2321096 | 1.2853087  | H  | -1.3847172 | -5.0883339 | -0.3423656 |
| H  | 2.5087841  | -4.2707259 | 0.0172702  | H  | 0.8118354  | -1.3116914 | 0.1540388  |
| TI | -1.5021100 | 0.2299132  | -0.0006660 | TI | -1.1099860 | 0.7829827  | 0.1277473  |

**IM, (Z)**

|    |            |            |            |
|----|------------|------------|------------|
| H  | 0.7016463  | -0.8940281 | -1.4608119 |
| N  | 1.0978628  | 0.8175431  | 1.0505793  |
| N  | 1.8861635  | 1.4757373  | 0.2567694  |
| O  | 1.5006805  | 0.6433176  | 2.1887334  |
| C  | 1.4398554  | 1.7398798  | -1.1131519 |
| C  | 3.1598929  | 1.9545339  | 0.7449188  |
| N  | 0.3584870  | 1.0825382  | -1.4652498 |
| O  | 2.1399601  | 2.5227377  | -1.7465687 |
| H  | 3.6507155  | 2.4607361  | -0.0709072 |
| H  | 3.0035961  | 2.6295152  | 1.5800750  |
| H  | 3.7503038  | 1.1126771  | 1.0938783  |
| O  | 0.3217026  | -1.7401961 | -1.1785048 |
| H  | 0.1114752  | 1.3648302  | -2.4039166 |
| C  | 1.3478620  | -2.6797726 | -0.8936490 |
| H  | 0.8452336  | -3.5839428 | -0.5602486 |
| H  | 1.8884549  | -2.9233148 | -1.8100068 |
| C  | 2.3134740  | -2.1996042 | 0.1657691  |
| H  | 1.7570773  | -1.9677994 | 1.0711073  |
| H  | 2.7726635  | -1.2694851 | -0.1703089 |
| C  | 3.3882089  | -3.2320480 | 0.4550578  |
| H  | 4.0778882  | -2.8777000 | 1.2150383  |
| H  | 2.9488227  | -4.1609018 | 0.8112180  |
| H  | 3.9644713  | -3.4583654 | -0.4390497 |
| TI | -1.4059842 | 0.0666543  | 0.0544992  |

**TS(IM-Pr), (Z)**

|   |           |            |            |
|---|-----------|------------|------------|
| H | 4.2797514 | -3.0813730 | -0.7698899 |
| C | 3.4309895 | -3.2014047 | -0.1006150 |
| C | 2.5150009 | -1.9930052 | -0.1586476 |
| H | 3.8160791 | -3.3525872 | 0.9028622  |
| H | 2.9010888 | -4.1044626 | -0.3950991 |
| C | 1.9836191 | -1.7653430 | -1.5550891 |
| H | 1.6775466 | -2.1258475 | 0.5254770  |
| H | 3.0415577 | -1.0997843 | 0.1751714  |
| O | 1.0743306 | -0.6716855 | -1.6284518 |
| H | 1.4296427 | -2.6358012 | -1.8964909 |
| H | 2.8086046 | -1.6046243 | -2.2503779 |

**IM, (E)**

|    |            |            |            |
|----|------------|------------|------------|
| N  | 2.4985547  | 0.1207069  | -1.2802731 |
| N  | 2.7257612  | -0.8047467 | -0.4188849 |
| O  | 1.8730719  | 1.1187597  | -0.9006532 |
| C  | 2.3842364  | -0.7716298 | 1.0318205  |
| C  | 3.5445477  | -1.9136648 | -0.8655757 |
| N  | 1.0984053  | -0.7214749 | 1.2593943  |
| O  | 3.3494776  | -0.8736349 | 1.7782696  |
| H  | 3.0053001  | -2.8446524 | -0.7237453 |
| H  | 3.7617115  | -1.7683141 | -1.9150495 |
| H  | 4.4608848  | -1.9394295 | -0.2880819 |
| O  | -0.5500212 | -1.2940936 | -0.9127273 |
| H  | 0.9456606  | -0.7928101 | 2.2589084  |
| C  | -1.5183650 | -2.3267113 | -1.0175899 |
| H  | -2.2306322 | -2.0036314 | -1.7723994 |
| H  | -1.0440409 | -3.2386596 | -1.3854569 |
| C  | -2.2324310 | -2.6140449 | 0.2848289  |
| H  | -2.7166566 | -1.7032356 | 0.6350224  |
| H  | -1.4952928 | -2.8918877 | 1.0376749  |
| C  | -3.2527527 | -3.7275933 | 0.1230045  |
| H  | -3.7536207 | -3.9452255 | 1.0613439  |
| H  | -4.0125466 | -3.4568909 | -0.6063549 |
| H  | -2.7765434 | -4.6432272 | -0.2202169 |
| H  | 0.0378501  | -1.4613315 | -0.1548492 |
| TI | -0.4794676 | 1.1522836  | 0.3615347  |

**TS(IM-Pr), (E)**

|   |            |            |            |
|---|------------|------------|------------|
| H | -3.7874021 | -3.9238813 | 0.1268911  |
| C | -3.9415171 | -2.8710907 | 0.3511365  |
| C | -2.6286512 | -2.1101350 | 0.3125643  |
| H | -4.4065666 | -2.8034759 | 1.3298341  |
| H | -4.6423230 | -2.4749498 | -0.3799037 |
| C | -1.9651993 | -2.2092070 | -1.0439404 |
| H | -2.7985560 | -1.0608827 | 0.5509804  |
| H | -1.9463490 | -2.4990577 | 1.0676435  |
| O | -0.7314930 | -1.5058642 | -1.1144845 |
| H | -2.6035075 | -1.7764615 | -1.8096901 |
| H | -1.8057201 | -3.2572926 | -1.3025646 |

|    |            |            |            |    |            |            |            |
|----|------------|------------|------------|----|------------|------------|------------|
| H  | 1.4843845  | 0.1034509  | -1.2258885 | H  | -0.1755773 | -1.7734506 | -0.3713710 |
| N  | -0.4987173 | 1.9155990  | -0.9750959 | N  | 0.6051448  | -1.1930657 | 1.4701502  |
| C  | 0.5110904  | 2.6315339  | -0.9344143 | C  | 1.8480857  | -1.2596704 | 1.5011999  |
| H  | -1.2100773 | 2.2978030  | -1.5877831 | H  | 0.2087234  | -1.2761931 | 2.4007934  |
| O  | 1.2687663  | 3.4982071  | -1.1225658 | O  | 2.9298390  | -1.3614508 | 1.9293611  |
| N  | 1.6819714  | 1.4486196  | 0.4641340  | N  | 2.2984887  | -1.2361471 | -0.5962253 |
| N  | 1.0641455  | 0.6380803  | 1.2135017  | N  | 2.3129789  | -0.2957519 | -1.4117621 |
| C  | 2.9415272  | 1.9669534  | 0.9481885  | C  | 3.0199292  | -2.4108102 | -1.0354520 |
| O  | 1.5616062  | 0.2826344  | 2.3061865  | O  | 1.7151644  | 0.7855645  | -1.0483943 |
| H  | 3.3050207  | 2.6845047  | 0.2227130  | H  | 2.3396678  | -3.2578034 | -1.0832787 |
| H  | 2.8225463  | 2.4451125  | 1.9191284  | H  | 3.4700406  | -2.2526557 | -2.0112886 |
| H  | 3.6674521  | 1.1637567  | 1.0747819  | H  | 3.7933427  | -2.6435708 | -0.3084828 |
| TI | -1.0581890 | -0.5223281 | 0.1634317  | TI | -0.4681171 | 1.0521101  | 0.0019575  |

**Pr, (Z)**

|    |            |            |            |
|----|------------|------------|------------|
| N  | 1.1620805  | -2.2829478 | -0.1369651 |
| N  | 2.0326936  | -2.9865999 | 0.3990956  |
| O  | 1.4926501  | -1.1324648 | -0.6475075 |
| C  | 3.3798898  | -2.4416994 | 0.4064282  |
| H  | 4.0274454  | -3.1571847 | 0.8966322  |
| H  | 3.7295088  | -2.2558576 | -0.6078031 |
| H  | 3.4111489  | -1.4889609 | 0.9323257  |
| O  | -2.1597006 | -0.7747441 | -1.7687842 |
| C  | -3.3338081 | -0.1514768 | -1.2576020 |
| H  | -2.0376063 | -1.6294419 | -1.3250190 |
| H  | -3.4552151 | 0.7717351  | -1.8185412 |
| H  | -4.2002371 | -0.7790828 | -1.4671081 |
| C  | -3.2444586 | 0.1394469  | 0.2241242  |
| H  | -2.3826717 | 0.7809433  | 0.4087322  |
| H  | -3.0619908 | -0.7923567 | 0.7568334  |
| C  | -4.5083289 | 0.8003037  | 0.7430791  |
| H  | -4.4363695 | 1.0025475  | 1.8071208  |
| H  | -4.6932013 | 1.7439614  | 0.2349349  |
| H  | -5.3735057 | 0.1614632  | 0.5827459  |
| C  | -1.9015556 | -4.1443294 | -0.0975757 |
| N  | -1.3734734 | -3.1023749 | -0.3578791 |
| O  | -2.4945282 | -5.1250489 | 0.1280895  |
| H  | -0.3381794 | -2.8105825 | -0.2345510 |
| TI | 0.1608171  | 0.6053383  | -1.7061739 |

**Pr, (E)**

|    |            |            |            |
|----|------------|------------|------------|
| H  | -3.3495060 | -3.6723466 | -1.6306583 |
| C  | -3.1615451 | -3.9809703 | -0.6047247 |
| C  | -1.8778687 | -3.3665905 | -0.0756227 |
| H  | -3.1149736 | -5.0653923 | -0.5868319 |
| H  | -4.0154104 | -3.6739483 | -0.0050360 |
| C  | -1.9334433 | -1.8558819 | -0.0958303 |
| H  | -1.6880448 | -3.6946031 | 0.9441908  |
| H  | -1.0290726 | -3.6949740 | -0.6757652 |
| O  | -0.7506173 | -1.2711863 | 0.4334524  |
| H  | -2.7574626 | -1.5001268 | 0.5178204  |
| H  | -2.1073371 | -1.5030803 | -1.1147666 |
| H  | 0.0121201  | -1.5063676 | -0.1450297 |
| N  | 2.2015573  | -0.7110844 | 1.8126706  |
| C  | 1.8879582  | -1.8481299 | 2.0334773  |
| H  | 2.1550445  | -0.2548974 | 0.8857891  |
| O  | 1.6159231  | -2.9330497 | 2.3615800  |
| N  | 1.3721747  | -1.5662849 | -1.3066270 |
| N  | 2.0533644  | -0.5480351 | -1.5042985 |
| C  | 1.6578587  | -2.6368521 | -2.2397575 |
| O  | 1.8345963  | 0.4307164  | -0.6613946 |
| H  | 0.7589955  | -2.8687675 | -2.8057047 |
| H  | 2.4602635  | -2.3705149 | -2.9222799 |
| H  | 1.9320920  | -3.5275896 | -1.6807766 |
| TI | -0.3266651 | 1.3172804  | 0.3007954  |

**TS(IM,(Z)→IM,(E))**

|   |           |            |            |
|---|-----------|------------|------------|
| H | 0.6849802 | -0.8364805 | -1.6532276 |
| N | 1.2135054 | 1.1351723  | 1.3945549  |
| N | 2.0301390 | 1.4553359  | 0.2294848  |
| O | 0.5086503 | 2.0202222  | 1.7218902  |

|    |            |            |            |
|----|------------|------------|------------|
| C  | 1.3068402  | 1.7245193  | -0.9599494 |
| C  | 3.1057185  | 2.3522006  | 0.6057032  |
| N  | 0.1715730  | 1.0372425  | -1.0846917 |
| O  | 1.8169913  | 2.4860735  | -1.7839051 |
| H  | 3.7158145  | 2.5150050  | -0.2719773 |
| H  | 2.7335961  | 3.3110345  | 0.9656111  |
| H  | 3.7062770  | 1.8832705  | 1.3789175  |
| O  | 0.4515658  | -1.7779093 | -1.6537206 |
| H  | -0.2524271 | 1.2951225  | -1.9665387 |
| C  | 1.5714752  | -2.5325101 | -1.2040408 |
| H  | 1.3268806  | -3.5770786 | -1.3760189 |
| H  | 2.4455471  | -2.2942053 | -1.8111434 |
| C  | 1.8753333  | -2.2932707 | 0.2588657  |
| H  | 1.0139969  | -2.6019572 | 0.8512672  |
| H  | 2.0067734  | -1.2233867 | 0.4121046  |
| C  | 3.1158510  | -3.0364195 | 0.7193626  |
| H  | 3.3134951  | -2.8544430 | 1.7713807  |
| H  | 3.0043705  | -4.1092783 | 0.5813280  |
| H  | 3.9896101  | -2.7171283 | 0.1563445  |
| TI | -1.2997216 | -0.5138298 | 0.2086310  |

## [5] Energies

All energies are given in Hartree and represent electronic energies, except for  $G_{-60^\circ\text{C}}$ , which includes the zero-point vibrational energy as well as additional temperature-dependent ( $T = 213.15$  K) enthalpic and entropic terms. Furthermore, foT/TZ refers to the focal-point method according to Eq. (3) in the paper and CBS(34) refers to two-point CBS extrapolations, using cc-pVTZ / cc-pVQZ basis sets. For TI we had to use the aug-cc-pwCVTZ-PP basis set instead of cc-pVTZ-F12. The energies were calculated for the geometries, provided above, which were optimised with PW6B95-D3 / (def2-)TZVPP and COSMO ( $\epsilon = 8.9$ ).

|                                       | PW6B95-D3/<br>(def2-)TZVPP<br>COSMO | $G_{-60^\circ\text{C}}$<br>(freeh) | PW6B95-D3/<br>(def2-)TZVPP<br>no COSMO | CCSD(T)/<br>foT/TZ | CCSD(T)/<br>CBS(34) | CCSD(T)(F12)<br>/cc-pVTZ-F12 |
|---------------------------------------|-------------------------------------|------------------------------------|----------------------------------------|--------------------|---------------------|------------------------------|
| <i>anti-7</i>                         | -394.5203                           | 0.0693                             | -394.5066                              | -393.4995          | -393.4843           | -393.4563                    |
| <b>TS(<i>anti-7</i>→<i>syn-7</i>)</b> | -394.4794                           | 0.0677                             | -394.4659                              | -393.4639          | -393.4480           | -393.4202                    |
| <i>syn-7</i>                          | -394.5127                           | 0.0696                             | -394.5000                              | -393.4937          | -393.4783           | -393.4503                    |
| <b>3</b>                              | -397.5717                           | 0.0281                             | -397.5513                              | -396.4825          | -396.1899           | -396.3968                    |
| <b>TS(3→1)</b>                        | -397.5018                           | 0.0254                             | -397.4832                              | -396.4089          | -396.1159           | -396.3226                    |
| <b>1</b>                              | -397.5784                           | 0.0280                             | -397.5620                              | -396.4918          | -396.2002           | -396.4065                    |
| <b>Ed, (Z)</b>                        | -761.2394                           | 0.1575                             | -761.2226                              | -759.1930          | -                   | -                            |
| <b>TS(Ed-IM), (Z)</b>                 | -761.2352                           | 0.1554                             | -761.2139                              | -759.1843          | -                   | -                            |
| <b>IM, (Z)</b>                        | -761.2476                           | 0.1581                             | -761.2295                              | -759.1997          | -                   | -                            |
| <b>TS(IM-Pr), (Z)</b>                 | -761.2175                           | 0.1552                             | -761.1984                              | -759.1647          | -                   | -                            |
| <b>Pr, (Z)</b>                        | -761.2302                           | 0.1514                             | -761.2118                              | -759.1818          | -                   | -                            |
| <b>Ed, (E)</b>                        | -761.2296                           | 0.1571                             | -761.2123                              | -759.1830          | -                   | -                            |
| <b>TS(Ed-IM), (E)</b>                 | -761.2256                           | 0.1538                             | -761.2042                              | -759.1751          | -                   | -                            |
| <b>IM, (E)</b>                        | -761.2361                           | 0.1569                             | -761.2151                              | -759.1864          | -                   | -                            |
| <b>TS(IM-Pr), (E)</b>                 | -761.2131                           | 0.1528                             | -761.1928                              | -759.1609          | -                   | -                            |
| <b>Pr, (E)</b>                        | -761.2363                           | 0.1527                             | -761.2165                              | -759.1865          | -                   | -                            |
| <b>TS(IM,(Z)→IM,(E))</b>              | -761.1939                           | 0.1562                             | -761.1728                              | -759.1469          | -                   | -                            |
